# Supplementary material
Source: Springer Nature journal article supplement (https://www.springermedizin.de/resource/supplementary/12885_2010_2200_MOESM7_ESM.pdf/9460746)
Supplement: MOESM7 [file 9460746]

| Number  | Sex/age | WHO subtype | IPSS | RUNX1 (exons 1-8) | TET2 (exons 3-11)          | ASXL1 (exon 12)   | NPM1 (exon 12) | CBL (exons 8, 9)  | FLT3 ITD/TKD | JAK2 (V617F) | RAS (exons 1,2) | IDH1 (exon 4) | IDH2 (exon 4) | WT1 (exons 7, 9) | Number of altered alleles | Karyotype                                                                                                                                                              |
|---------|---------|-------------|------|-------------------|----------------------------|-------------------|----------------|-------------------|--------------|--------------|-----------------|---------------|---------------|------------------|---------------------------|------------------------------------------------------------------------------------------------------------------------------------------------------------------------|
| HD-0288 | M/61    | RA          | 0    | no                | no                         | no                | no             | no                | no           | no           | no              | no            | no            | no               | 0                         | 46,XY[20]                                                                                                                                                              |
| HD-0292 | M/76    | RA          | 0    | no                | no                         | no                | no             | no                | no           | no           | no              | no            | no            | no               | 0                         | 46,XY[20]                                                                                                                                                              |
| HD-0302 | M/75    | RA          | 0.5  | no                | no                         | no                | no             | no                | no           | no           | no              | no            | no            | no               | 0                         | 46,XY[20]                                                                                                                                                              |
| HD-0378 | M/68    | RA          | 1    | no                | no                         | no                | no             | no                | no           | no           | no              | no            | no            | no               | 0                         | 46,XY,del(20)(q11q13)[20]                                                                                                                                              |
| HD-0384 | F/84    | RA          | 0    | no                | no                         | p.Ser1457ProfsX18 | no             | no                | no           | no           | no              | no            | no            | no               | 1                         | 46,XX,del(5)(q13q31)10/46,XX[10]                                                                                                                                       |
| HD-0145 | F/68    | RARS        | 0.5  | no                | deletion                   | no                | no             | no                | no           | no           | no              | no            | no            | no               | 1                         | 46,XX[20]                                                                                                                                                              |
| HD-0150 | F/83    | RARS        | 0    | no                | no                         | no                | no             | no                | no           | no           | no              | no            | no            | no               | 0                         | 46,XX[5]                                                                                                                                                               |
| HD-0165 | M/60    | RARS        | 0    | no                | no                         | no                | no             | no                | no           | no           | no              | no            | no            | no               | 0                         | 46,XY[20]                                                                                                                                                              |
| HD-0173 | M/71    | RARS        | 0    | p.Asn146MetfsX6   | no                         | no                | no             | no                | no           | no           | no              | no            | no            | no               | 1                         | 46,XY[20]                                                                                                                                                              |
| HD-0192 | M/82    | RARS        | 0.5  | no                | no                         | no                | no             | no                | no           | no           | no              | no            | no            | no               | 0                         | 46,XY,inv(9)(p12q12)?c[20]                                                                                                                                             |
| HD-0246 | M/80    | RARS        | 0    | no                | no                         | no                | no             | no                | no           | no           | no              | no            | no            | no               | 0                         | 45,X,-Y[17]/46,XY[5]                                                                                                                                                   |
| HD-0258 | M/81    | RARS        | 0.5  | no                | no                         | no                | no             | no                | no           | no           | no              | no            | no            | no               | 0                         | 47,XY,+8[10]/46,XY[10]                                                                                                                                                 |
| HD-0260 | F/57    | RARS        | 0.5  | no                | no                         | no                | no             | no                | no           | no           | no              | no            | no            | no               | 0                         | 46,XX[20]                                                                                                                                                              |
| HD-0262 | F/73    | RARS        | 0    | no                | p.Gln1524X                 | no                | no             | no                | no           | no           | no              | no            | no            | no               | 1                         | 46,XX[20]                                                                                                                                                              |
| HD-0285 | F/87    | RARS        | 0    | no                | no                         | no                | na             | no                | no           | no           | no              | no            | no            | no               | 0                         | 46,XX[20]                                                                                                                                                              |
| HD-0430 | F/68    | RARS        | 0    | no                | no                         | no                | no             | no                | no           | no           | no              | no            | no            | no               | 0                         | 46,XX[20]                                                                                                                                                              |
| HD-0487 | M/70    | RARS        | 0    | no                | no                         | no                | no             | no                | no           | no           | no              | no            | no            | no               | 0                         | 46,XY[20]                                                                                                                                                              |
| HD-0637 | M/64    | RARS+MF     | 0    | no                | p.Leu1360Gln               | no                | no             | no                | no           | no           | no              | no            | no            | no               | 1                         | 46,XY[20]                                                                                                                                                              |
| HD-0172 | M/79    | RCMD        | 0.5  | no                | no                         | no                | no             | no                | no           | no           | no              | no            | no            | no               | 0                         | 46,XY[20]                                                                                                                                                              |
| HD-0191 | F/81    | RCMD        | 0.5  | no                | no                         | no                | no             | no                | no           | no           | no              | no            | no            | no               | 0                         | 46,XX[20]                                                                                                                                                              |
| HD-0235 | F/51    | RCMD        | 0    | no                | no                         | no                | no             | no                | no           | no           | no              | no            | no            | no               | 0                         | 46,XX[20]                                                                                                                                                              |
| HD-0289 | F/83    | RCMD        | 0.5  | no                | p.Gln1627IlefsX31          | no                | no             | no                | no           | no           | no              | no            | no            | no               | 1                         | 46,XX[20]                                                                                                                                                              |
| HD-0371 | M/74    | RCMD        | 0.5  | no                | no                         | no                | no             | no                | no           | no           | no              | no            | no            | no               | 0                         | 46,XY[20]                                                                                                                                                              |
| HD-0670 | F/71    | RCMD        | 0.5  | no                | no                         | no                | no             | no                | no           | p.Gly12Asp   | no              | no            | no            | no               | 1                         | 46,XX[20]                                                                                                                                                              |
| HD-0747 | M/77    | RCMD        | 0.5  | no                | no                         | no                | no             | no                | no           | no           | no              | no            | no            | no               | 0                         | 46,XY[20]                                                                                                                                                              |
| HD-0152 | F/75    | RAEB1       | 1    | no                | p.val218TrpfsX32           | no                | no             | no                | no           | no           | no              | no            | no            | no               | 1                         | 46,XX[20]                                                                                                                                                              |
| HD-0167 | F/77    | RAEB1       | 2.5  | no                | no                         | no                | no             | no                | no           | no           | no              | no            | no            | no               | 0                         | 46,XX,-5,-6,-7,-17,+mar[5]/46,XX[15]                                                                                                                                   |
| HD-0183 | M/70    | RAEB1       | 0.5  | no                | no                         | no                | no             | no                | no           | no           | no              | no            | no            | no               | 0                         | 46,XY[20]                                                                                                                                                              |
| HD-0190 | M/77    | RAEB1       | 2.5  | no                | no                         | deletion          | no             | no                | no           | no           | no              | no            | no            | no               | 1                         | 44,XY,ins(2;12)(p23;q13q24),del(2)(q23q25),der(7;16)(p10;q10),-12,-18,del(20)(q11q13),+mar[2]/47,sl,+1,-13,+3,mar[3]/43,sl,dup(1)(q25q32),del(7)(p11),-13[14]/46,XY[1] |
| HD-0196 | M/78    | RAEB1       | 0.5  | no                | p.Pro1419Arg               | p.Gly646TrpfsX12  | no             | no                | no           | no           | no              | no            | no            | no               | 2                         | 46,XY[20]                                                                                                                                                              |
| HD-0205 | M/60    | RAEB1       | 2.5  | no                | no                         | no                | no             | no                | no           | no           | no              | no            | no            | no               | 0                         | 45,XY,del(4)(q?q?),del(5)(q22q34),-7,+8,-12,dup(12)(q21q24),-21,+mar[11]/46,XY[1]                                                                                      |
| HD-0233 | M/62    | RAEB1       | 0.5  | no                | p.Arg1440ThrfsX38          | no                | no             | no                | no           | no           | no              | no            | no            | no               | 1                         | 46,XY[20]                                                                                                                                                              |
| HD-0239 | F/59    | RAEB1       | 0.5  | no                | no                         | no                | no             | no                | no           | no           | no              | no            | no            | no               | 0                         | 46,XX[20]                                                                                                                                                              |
| HD-0269 | M/60    | RAEB1       | na   | no                | no                         | p.Gly646TrpfsX12  | no             | no                | no           | no           | no              | p.Arg132Cys   | no            | no               | 2                         | 46,XY[20]                                                                                                                                                              |
| HD-0270 | M/79    | RAEB1       | 0.5  | no                | no                         | no                | no             | no                | no           | no           | no              | no            | no            | no               | 0                         | 46,XY,del(5)(q15q34)[8]/46,XY[12]                                                                                                                                      |
| HD-0286 | F/73    | RAEB1       | 2    | no                | p.Pro1575PhefsX31          | no                | no             | no                | no           | no           | no              | no            | no            | no               | 1                         | 46,XX,-7,+mar[3]/46,XX[17]                                                                                                                                             |
| HD-0296 | M/62    | RAEB1       | 0.5  | no                | no                         | no                | no             | no                | no           | no           | no              | p.Arg132Cys   | no            | no               | 1                         | 46,XY[20]                                                                                                                                                              |
| HD-0300 | M/72    | RAEB1       | 0.5  | no                | p.Lys1197Arg (nc)          | no                | no             | no                | no           | no           | no              | no            | no            | no               | 1                         | 46,XY[4]                                                                                                                                                               |
| HD-0311 | M/85    | RAEB1       | 0.5  | no                | p.Ser1286Pro; p.Asp1384His | no                | no             | no                | no           | no           | no              | no            | no            | no               | 2                         | 46,XY[20]                                                                                                                                                              |
| HD-0394 | F/70    | RAEB1       | na   | no                | no                         | no                | no             | no                | no           | no           | no              | no            | no            | no               | 0                         | 46,XX[20]                                                                                                                                                              |
| HD-0434 | M/65    | RAEB1       | 0.5  | no                | p.Phe797SerfsX16           | no                | no             | no                | no           | no           | no              | no            | no            | no               | 1                         | 46,XY[20]                                                                                                                                                              |
| HD-0169 | F/62    | RAEB2       | 1.5  | no                | no                         | no                | no             | no                | no           | no           | no              | no            | no            | no               | 0                         | 46,XX[20]                                                                                                                                                              |
| HD-0175 | M/71    | RAEB2       | 2    | no                | no                         | no                | no             | no                | no           | no           | no              | no            | p.Arg140Gln   | no               | 1                         | 46,XY[20]                                                                                                                                                              |
| HD-0180 | M/81    | RAEB2       | 2    | no                | no                         | p.Gly646TrpfsX12  | no             | p.Tyr368X         | no           | no           | no              | p.Arg140Gln   | no            | no               | 3                         | 46,XY[20]                                                                                                                                                              |
| HD-0186 | M/81    | RAEB2       | na   | p.Gly170Arg       | no                         | p.Gly646TrpfsX12  | no             | no                | no           | no           | no              | no            | no            | no               | 2                         | 46,XY[20]                                                                                                                                                              |
| HD-0193 | F/69    | RAEB2       | 3.5  | no                | no                         | no                | no             | p.Cys381Arg       | no           | no           | no              | no            | no            | no               | 1                         | 47,XX,del(5)(q23q34),+21[10]/46,idem,-7[7]/48,idem,+22[3]                                                                                                              |
| HD-0195 | M/72    | RAEB2       | 2.5  | no                | no                         | no                | no             | no                | no           | no           | no              | no            | no            | no               | 0                         | 47,XY,+8[20]                                                                                                                                                           |
| HD-0208 | F/50    | RAEB2       | 1.5  | no                | no                         | p.Gly646TrpfsX12  | no             | no                | no           | no           | no              | p.Arg140Gln   | no            | no               | 2                         | 46,XX[20]                                                                                                                                                              |
| HD-0210 | M/72    | RAEB2       | 2    | p.Arg201Gln       | no                         | p.Gly646TrpfsX12  | no             | no                | no           | no           | no              | no            | no            | no               | 2                         | 46,XY[20]                                                                                                                                                              |
| HD-0232 | M/63    | RAEB2       | na   | break             | no                         | no                | no             | no                | no           | no           | no              | no            | no            | no               | 1                         | na                                                                                                                                                                     |
| HD-0250 | M/80    | RAEB2       | 2    | no                | no                         | p.Gly646TrpfsX12  | no             | no                | no           | no           | no              | no            | no            | no               | 1                         | 47,XY,+X?c[20]                                                                                                                                                         |
| HD-0263 | M/67    | RAEB2       | 2    | no                | no                         | no                | no             | p.Pro417Leu (hom) | no           | no           | no              | no            | no            | no               | 1                         | 47,XY,+8[19]/46,XY[1]                                                                                                                                                  |
| HD-0264 | M/68    | RAEB2       | 1.5  | no                | p.Leu862SerfsX6            | p.Gly646TrpfsX12  | no             | p.Glu366Lys       | no           | no           | no              | no            | no            | no               | 3                         | 47,XY,+11[20]                                                                                                                                                          |
| HD-0275 | M/83    | RAEB2       | na   | no                | no                         | p.Gly646TrpfsX12  | no             | no                | no           | no           | no              | no            | no            | no               | 1                         | 46,XY,-7,+mar[5]/47,sl,+7del(7)(q11q36)[4]/47,sl,del(14)(q273q37)[6]/46,XY[5]                                                                                          |
| HD-0375 | M/76    | RAEB2       | 2    | no                | no                         | no                | no             | p.Leu380Pro       | no           | no           | no              | no            | no            | no               | 1                         | 47,XY,+8[20]                                                                                                                                                           |
| HD-0377 | F/86    | RAEB2       | 3    | p.Ala142GlyfsX2   | no                         | p.Arg596ProfsX23  | no             | no                | no           | no           | no              | no            | no            | no               | 2                         | 45,XX,-7[14]/46,XX[6]                                                                                                                                                  |
| HD-0411 | F/59    | RAEB2       | 3    | no                | no                         | no                | no             | no                | no           | no           | no              | no            | no            | no               | 0                         | 46,XX,del(5)(q13q34),+21[10]/46,XX[6]                                                                                                                                  |
| HD-0425 | M/88    | RAEB2       | 1.5  | no                | no                         | p.Gly646TrpfsX12  | no             | no                | no           | no           | no              | no            | no            | no               | 1                         | 46,XY[20]                                                                                                                                                              |
| HD-0486 | F/58    | RAEB2       | 1    | no                | no                         | no                | no             | no                | no           | no           | no              | no            | no            | no               | 0                         | 46,XX[20]                                                                                                                                                              |
| HD-0490 | M/74    | RAEB2       | 2    | no                | p.Ser356ProfsX16           | no                | no             | no                | no           | no           | no              | no            | no            | no               | 1                         | 46,XY[20]                                                                                                                                                              |
| HD-0158 | F/85    | MDS-U       | 0    | no                | no                         | no                | no             | no                | no           | no           | no              | no            | no            | no               | 0                         | 46,XX[20]                                                                                                                                                              |
| HD-0166 | M/79    | MDS-U       | 0    | no                | no                         | no                | no             | no                | no           | no           | no              | no            | no            | no               | 0                         | 46,XY[20]                                                                                                                                                              |
| HD-0171 | F/55    | MDS-U       | 0    | no                | no                         | no                | no             | no                | no           | no           | no              | no            | no            | no               | 0                         | 46,XX[20]                                                                                                                                                              |
| HD-0295 | M/69    | MDS-U       | na   | no                | no                         | no                | no             | no                | no           | yes          | no              | no            | no            | no               | 1                         | 46,XY,del(20)(q11q13)[20]                                                                                                                                              |
| HD-0310 | F/81    | MDS-U       | 0    | no                | no                         | no                | no             | no                | no           | no           | no              | no            | no            | no               | 0                         | 46,XX[20]                                                                                                                                                              |

Table 1 : Mutations of candidate genes in a series of myelodysplastic syndromes.

hom, homozygous; MDS-U, MDS unclassified; na, not available; nc, non constitutional; RA, refractory anemia; RARS, refractory anemia with ring sideroblasts; RAEB, refractory anemia with excess of blasts; RCMD, refractory cytopenia with multilineage dysplasia. In bold, cases with acute phase in Table 2.
